# Supplementary material
Source: publisher figshare collection journal article supplement (https://gsajournals.figshare.com/ndownloader/files/28005732)
Supplement: Supplementary file 1 [file 28005732]

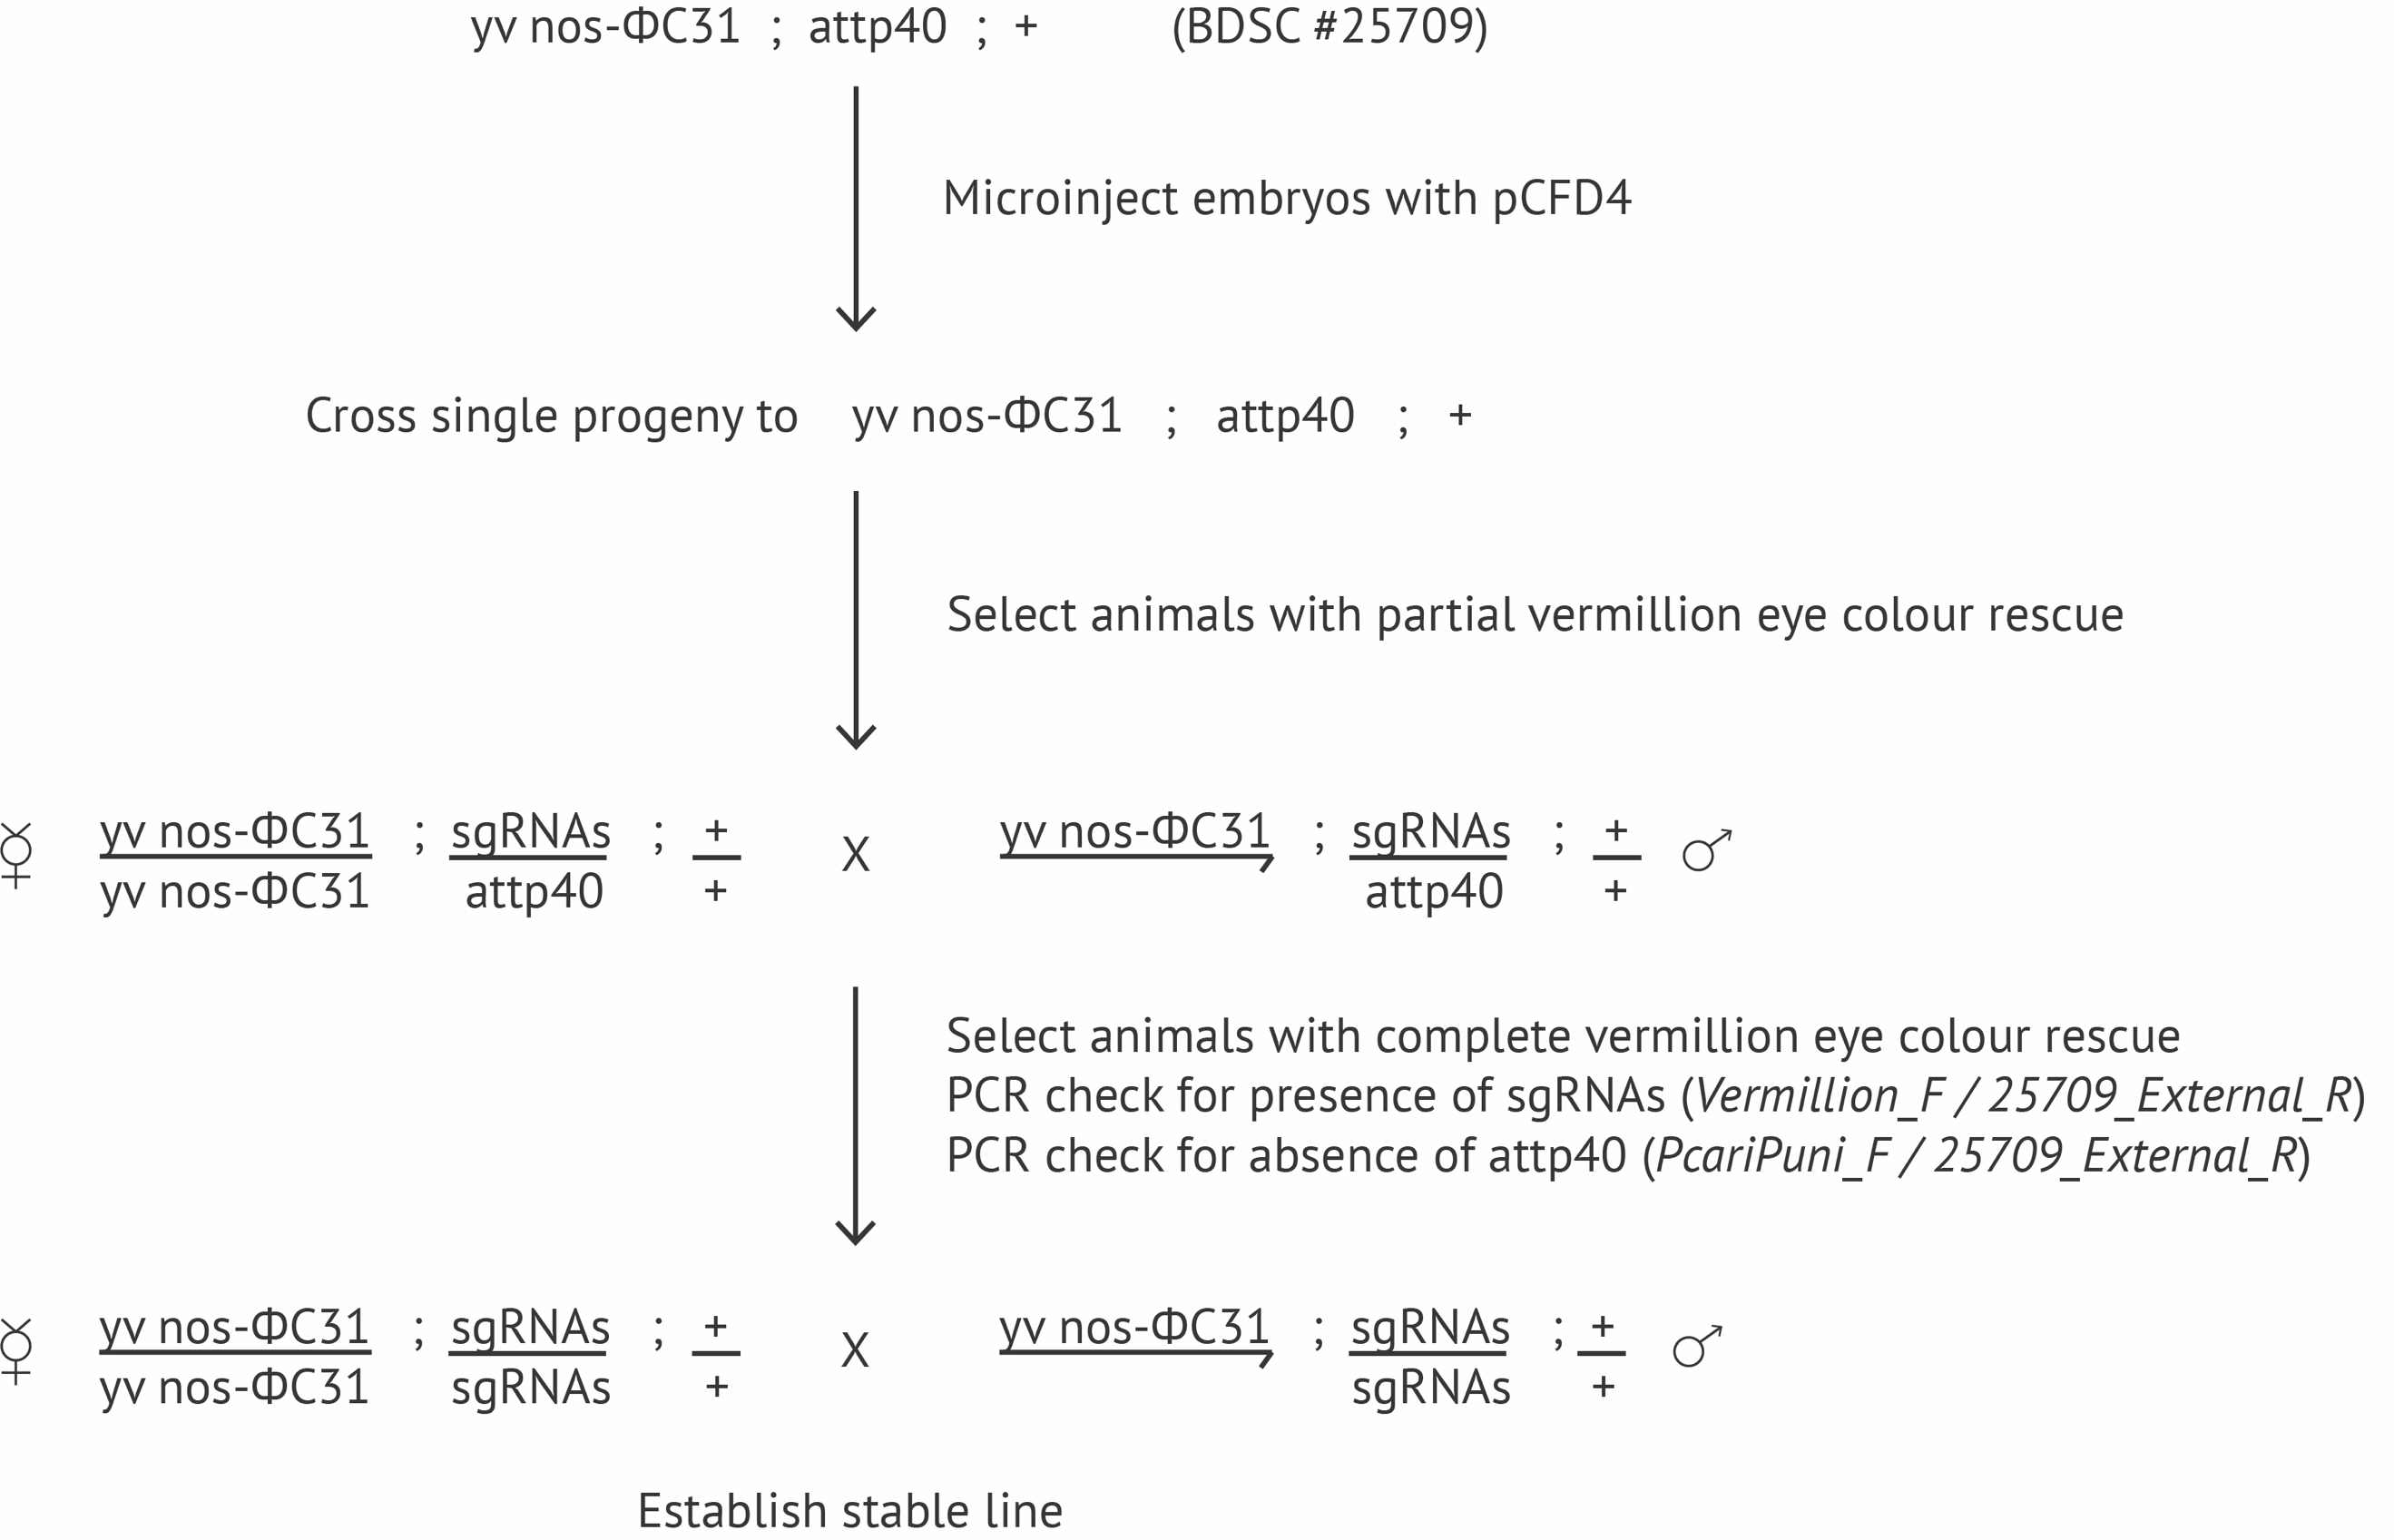


**Figure S1 Crossing scheme used to generate transgenic sgRNA strains**

This crossing scheme was repeated for two different pCFD4 plasmids. In pCFD4-*Dβ1*, “sgRNAs” refers to *5’UTR_sgRNA* and *sgRNA2*, while in pCFD4-*Dβ1-ex3,* “sgRNAs” refers to 5*’UTR_sgRNA* and *sgRNA1*. sgRNA positions are shown in Figure 1. All fly strains are described in Tables S1 and S2. Primer sequences are available in Table S3.
